# Supplementary material
Source: ML conference proceedings conference paper supplement (https://openreview.net/forum?id=Qabko39AS5)
Supplement: supplementary_material [file ablation_noise-shap_error.pdf › kernelprob/archive/images/ablation_noise-shap_error.pdf]

IRIS ( $n = 4$ )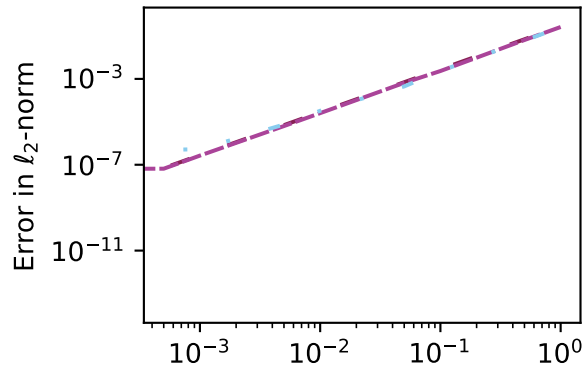California ( $n = 8$ )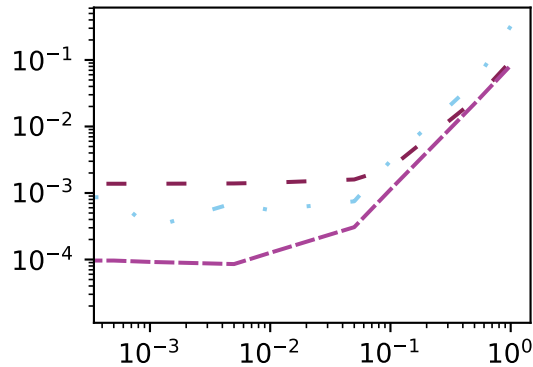Diabetes ( $n = 10$ )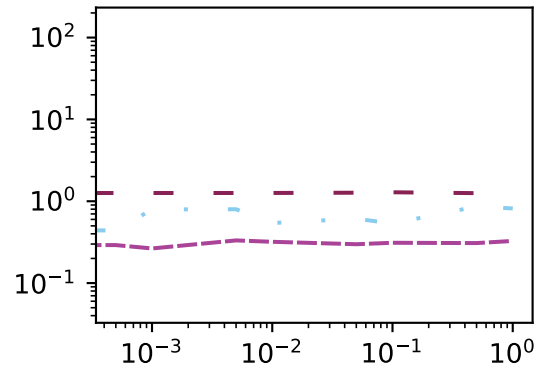Adult ( $n = 12$ )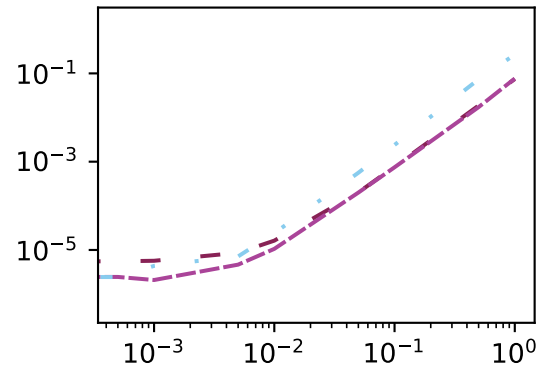Correlated ( $n = 60$ )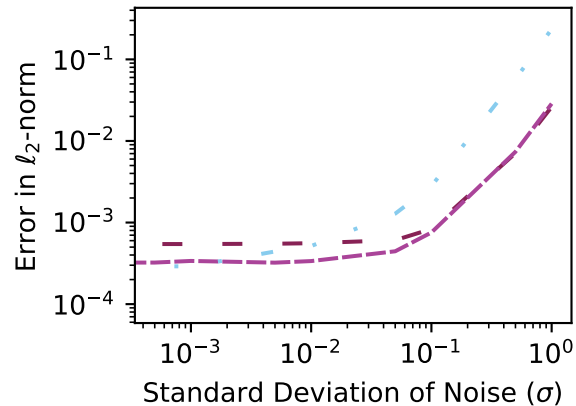Independent ( $n = 60$ )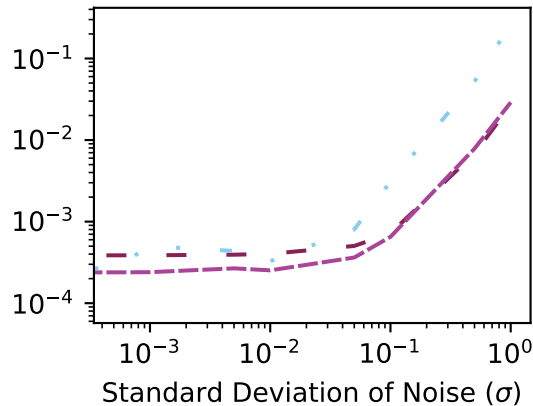NHANES ( $n = 79$ )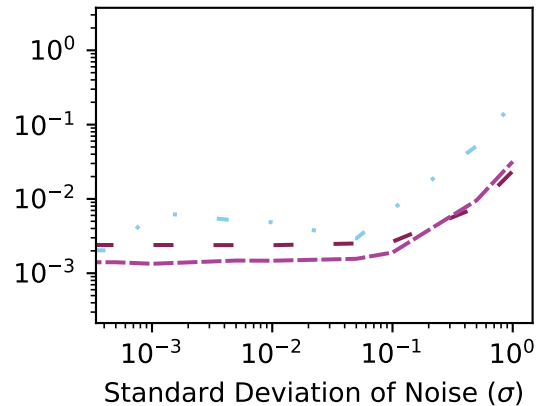Communities ( $n = 101$ )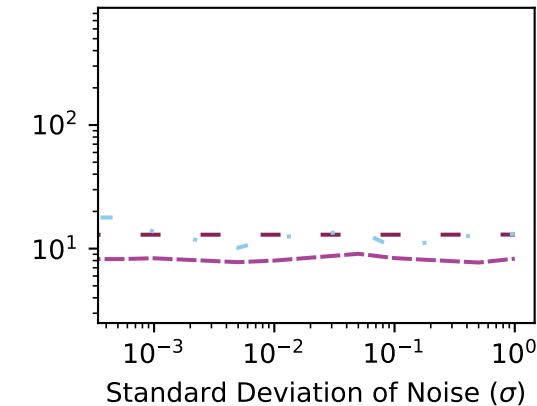

Kernel PROB   Optimized Kernel SHAP   Leverage SHAP   Permutation SHAP
