# Supplementary material
Source: ML conference proceedings conference paper supplement (https://openreview.net/forum?id=Qabko39AS5)
Supplement: supplementary_material [file ablation_sample_size-weighted_error.pdf › kernelprob/archive/images/ablation_sample_size-weighted_error.pdf]

IRIS ( $n = 4$ )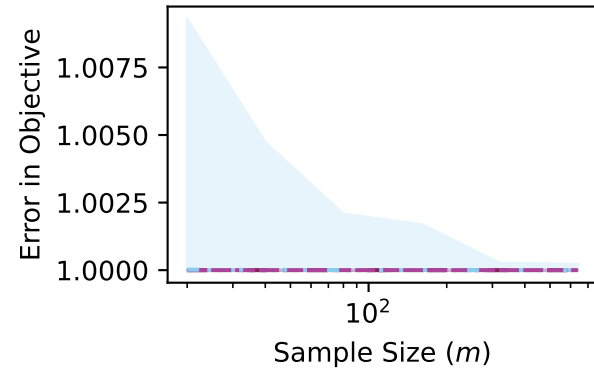California ( $n = 8$ )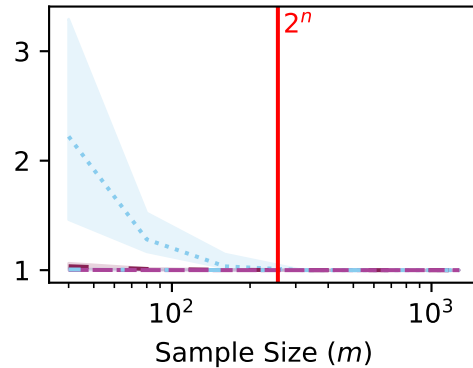Diabetes ( $n = 10$ )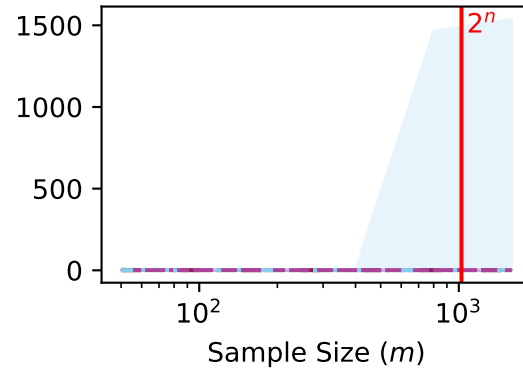Adult ( $n = 12$ )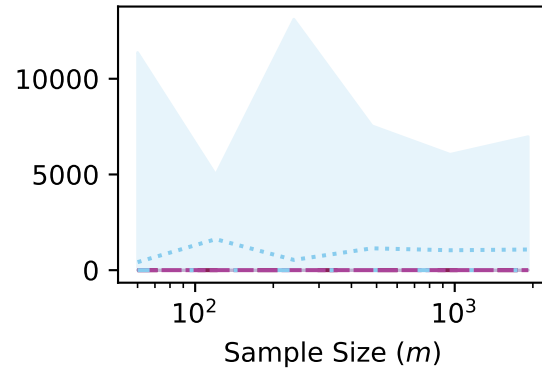

..... Kernel PROB    - · - Optimized Kernel SHAP    - - - Leverage SHAP    - · - Permutation SHAP
