# Supplementary material
Source: ML conference proceedings conference paper supplement (https://openreview.net/forum?id=Qabko39AS5)
Supplement: supplementary_material [file fit_datasets.pdf › kernelprob/images/fit_datasets.pdf]

# Error by Ground Truth Model and Regression Model

Linear

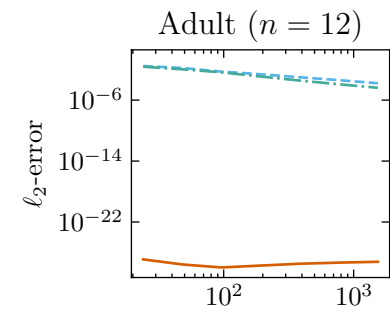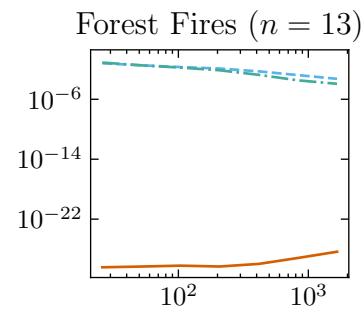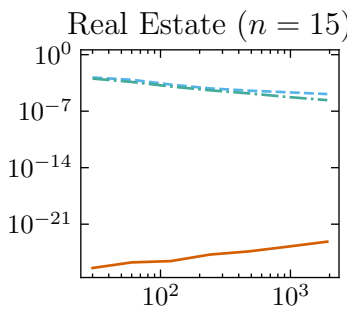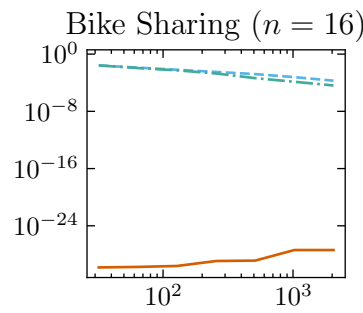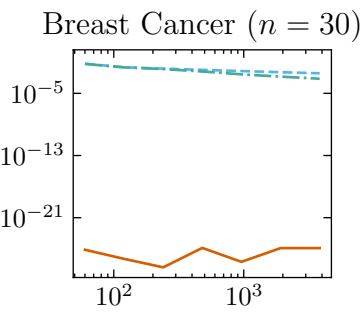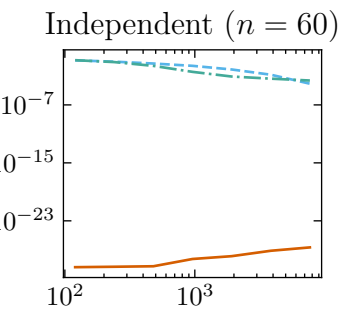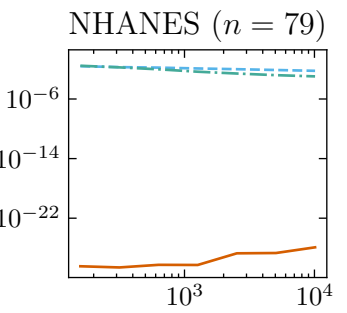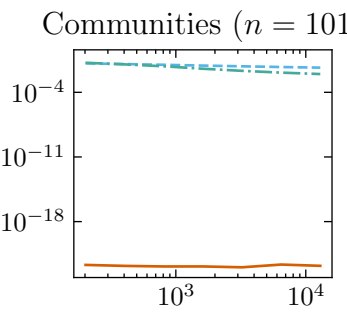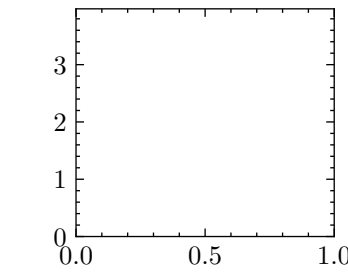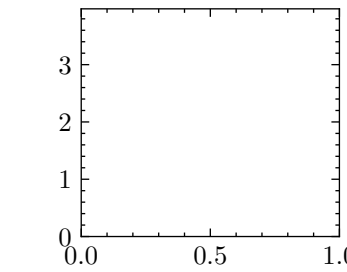

RandomForest

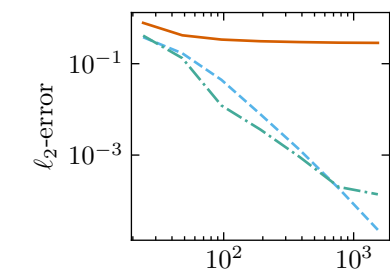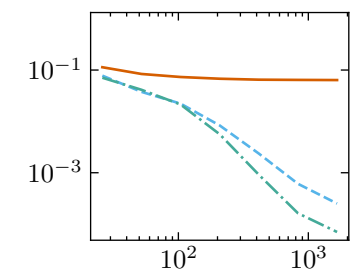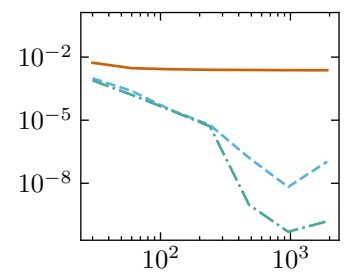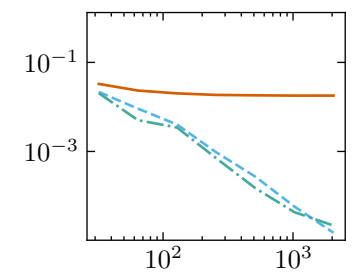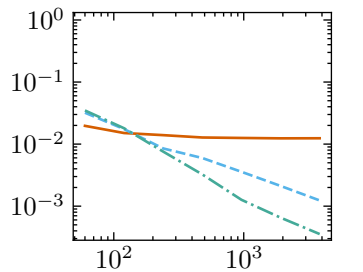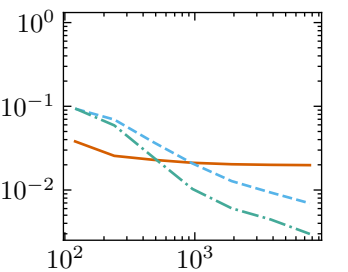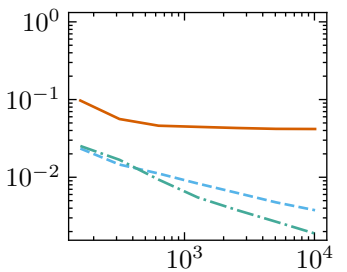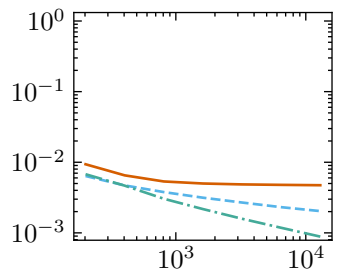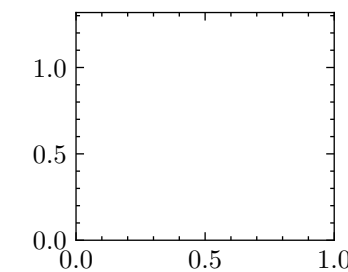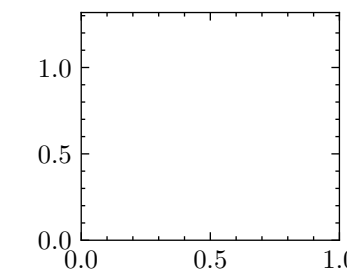

NeuralNet

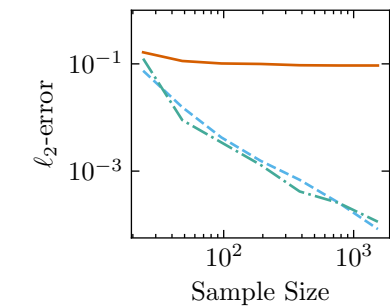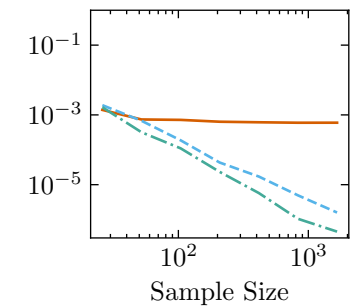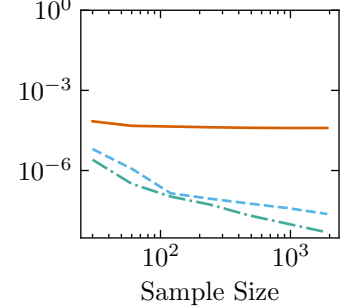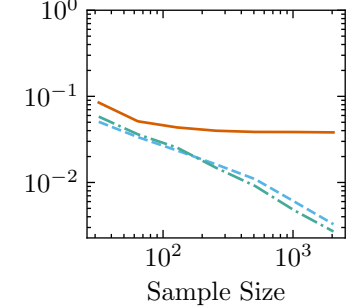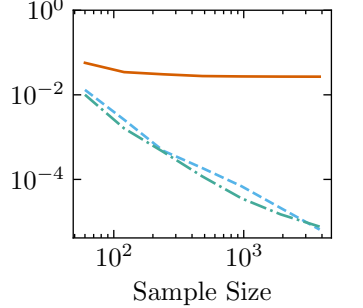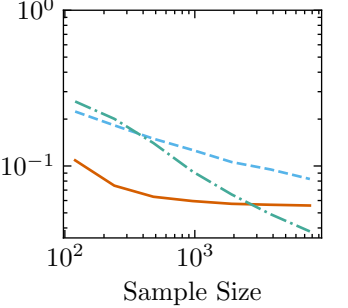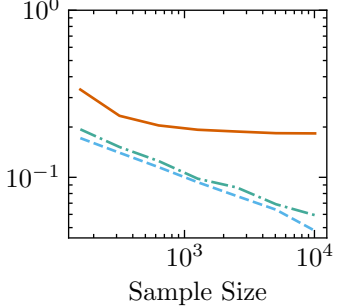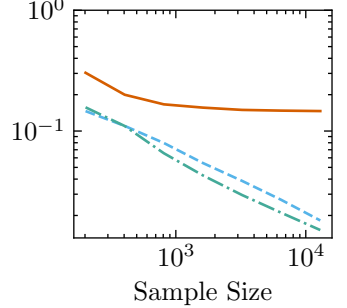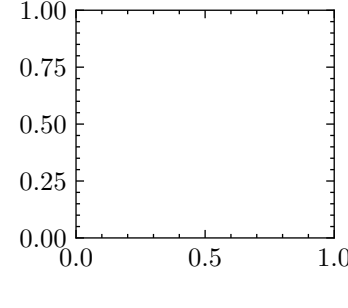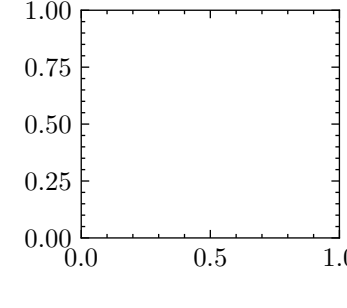

— Linear    - - - RandomForest    - . - XGBoost
