# Supplementary material
Source: ML conference proceedings conference paper supplement (https://openreview.net/forum?id=Qabko39AS5)
Supplement: supplementary_material [file main_sample_size-shap_error.pdf › kernelprob/archive/images/main_sample_size-shap_error.pdf]

IRIS ( $n = 4$ )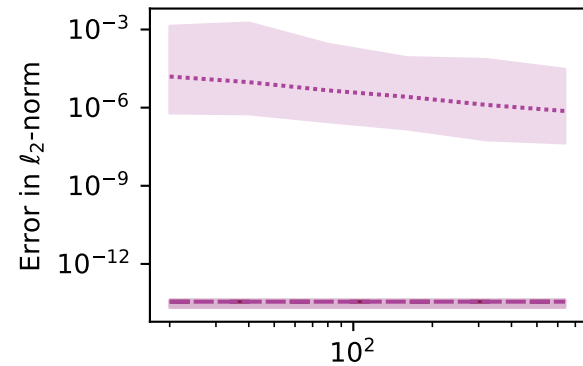California ( $n = 8$ )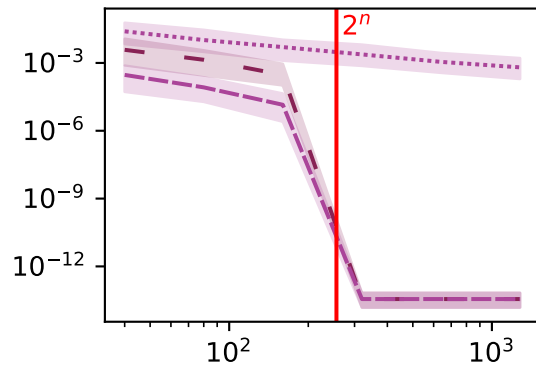Diabetes ( $n = 10$ )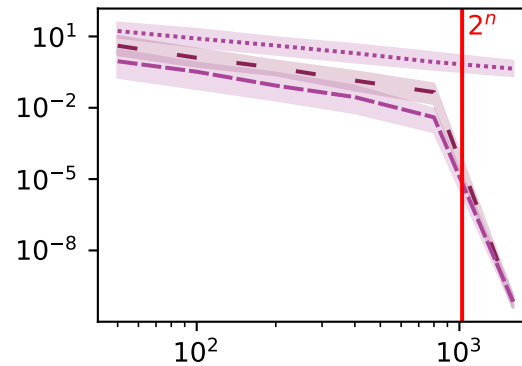Adult ( $n = 12$ )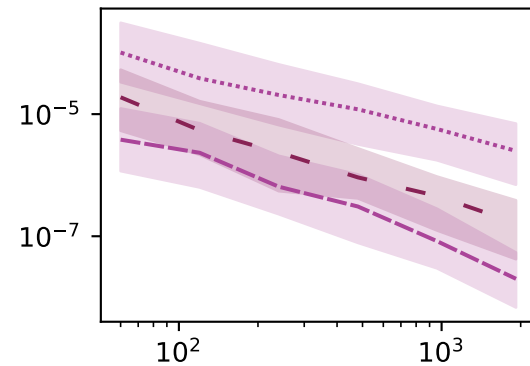Correlated ( $n = 60$ )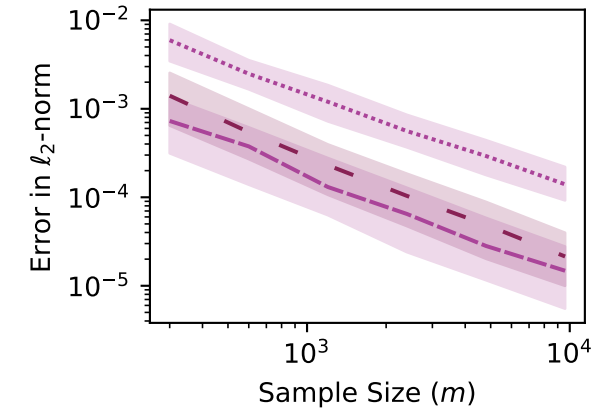Independent ( $n = 60$ )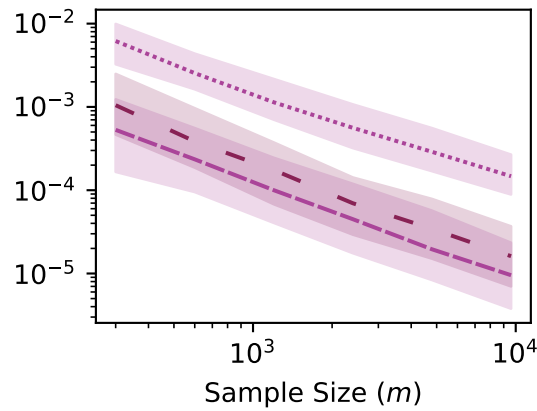NHANES ( $n = 79$ )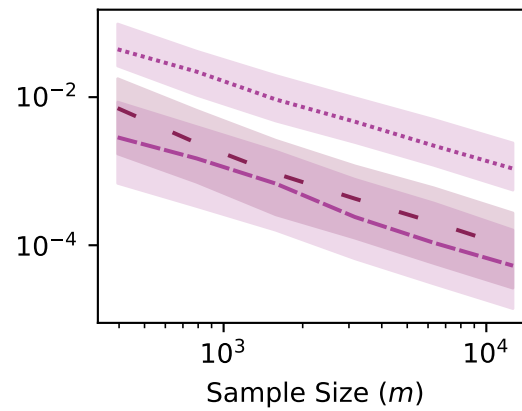Communities ( $n = 101$ )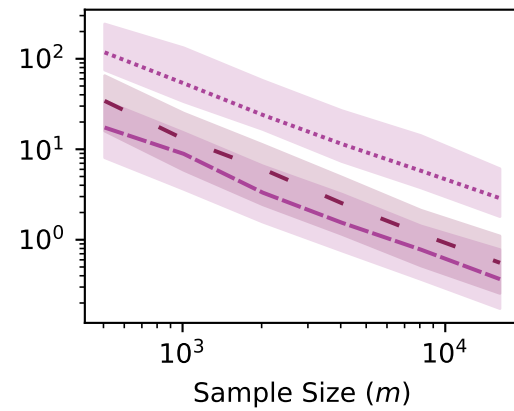

..... Kernel SHAP    - - - Optimized Kernel SHAP    - . - Leverage SHAP
