# Supplementary material
Source: ML conference proceedings conference paper supplement (https://openreview.net/forum?id=Qabko39AS5)
Supplement: supplementary_material [file prob_datasets.pdf › kernelprob/images/prob_datasets.pdf]

Probabilistic Value Estimator Error by Dataset

Symmetric Beta

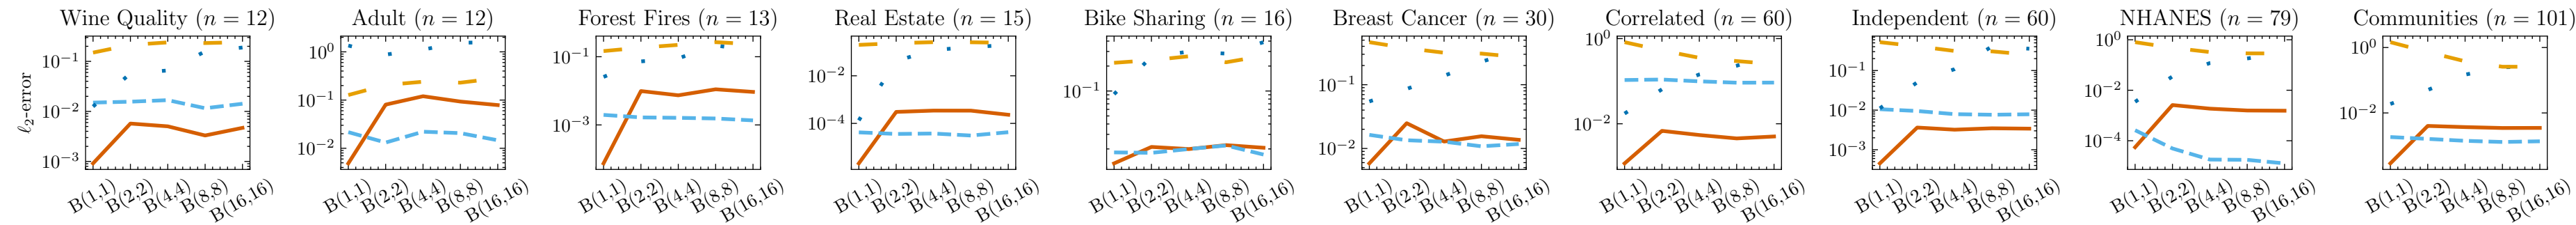

Asymmetric Beta

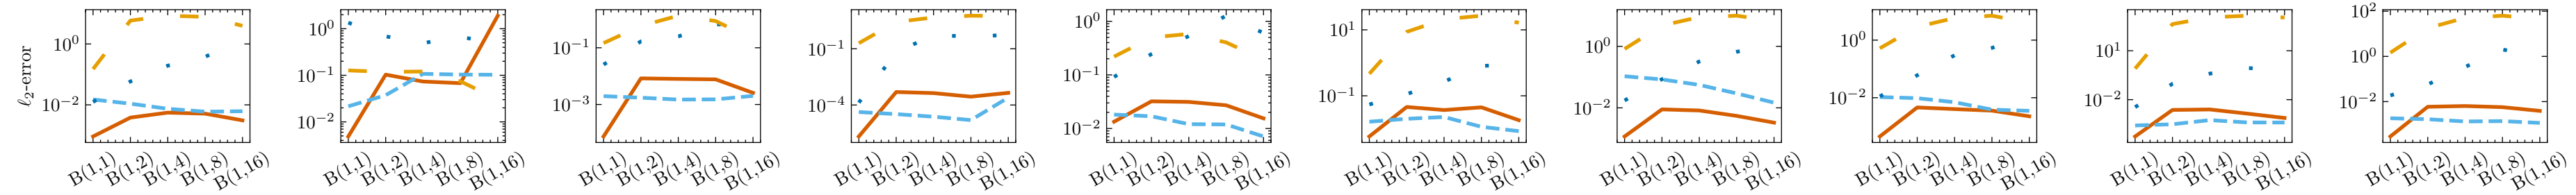

Weighted Banzhaf

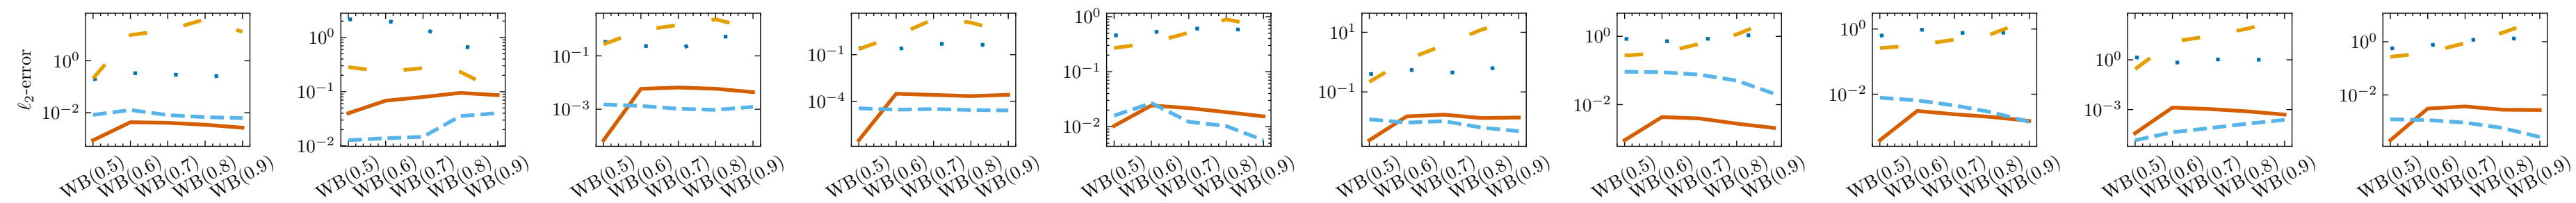

LinearMSR TreeMSR WSL OFA\_S
