# Supplementary material
Source: ML conference proceedings conference paper supplement (https://openreview.net/forum?id=Qabko39AS5)

IRIS ( $n = 4$ )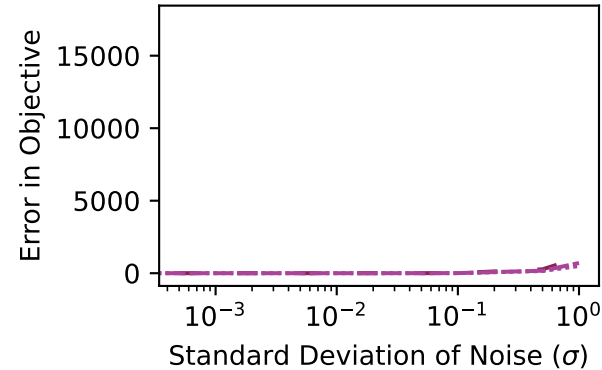California ( $n = 8$ )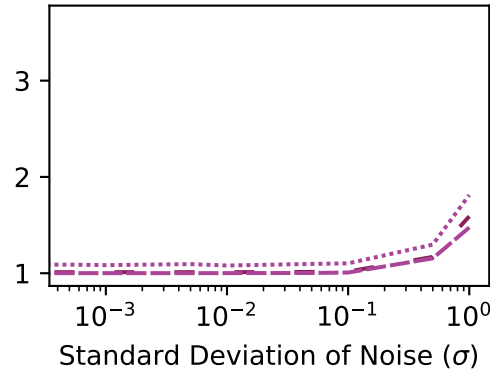Diabetes ( $n = 10$ )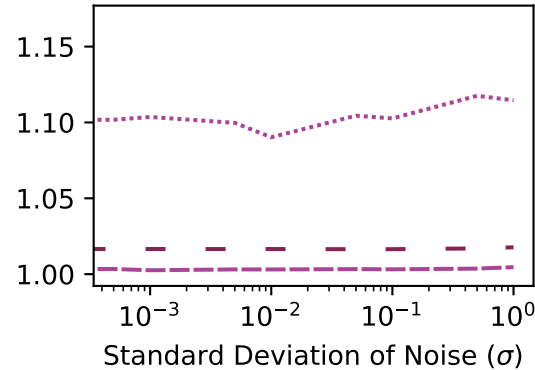Adult ( $n = 12$ )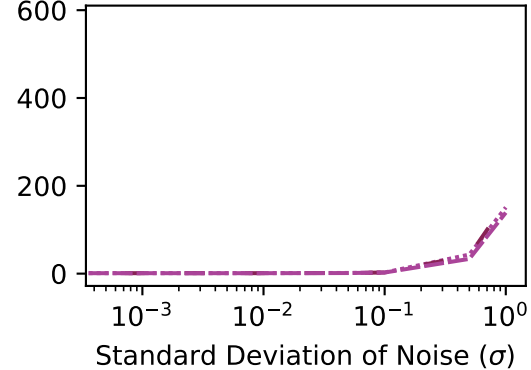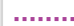

Kernel SHAP

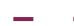

Optimized Kernel SHAP

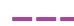

Leverage SHAP

Supplement: supplementary_material [file main_noise-weighted_error.pdf › kernelprob/archive/images/main_noise-weighted_error.pdf]

IRIS ( $n = 4$ )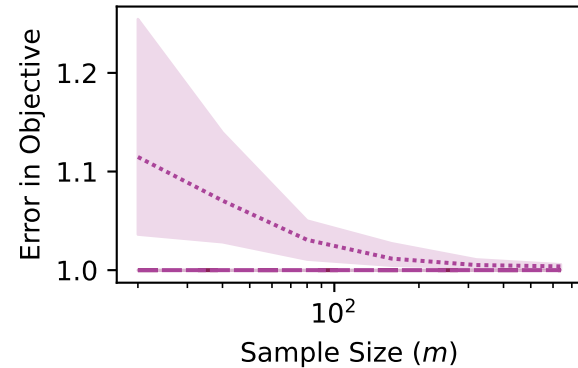California ( $n = 8$ )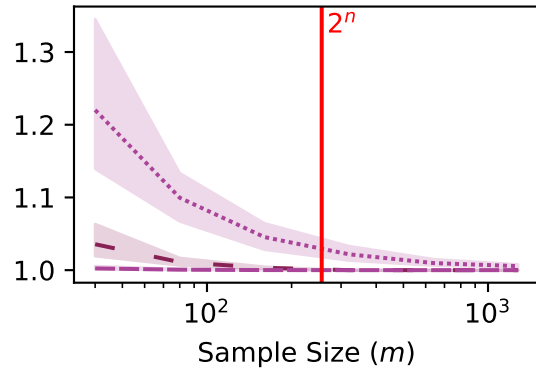Diabetes ( $n = 10$ )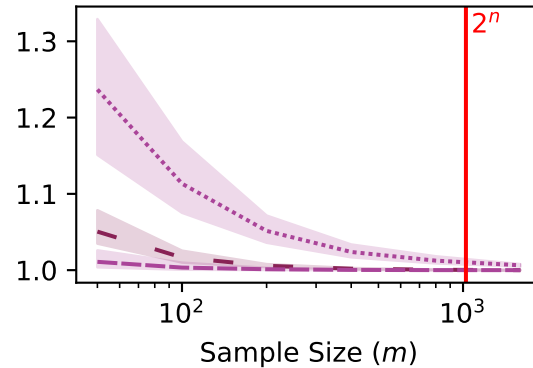Adult ( $n = 12$ )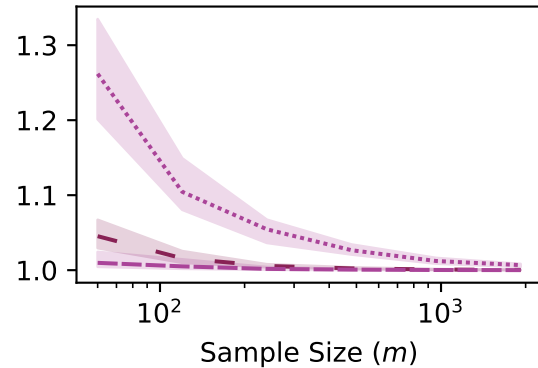

..... Kernel SHAP      - · - Optimized Kernel SHAP      --- Leverage SHAP

Supplement: supplementary_material [file main_sample_size-weighted_error.pdf › kernelprob/archive/images/main_sample_size-weighted_error.pdf]

Probability

$n = 10$

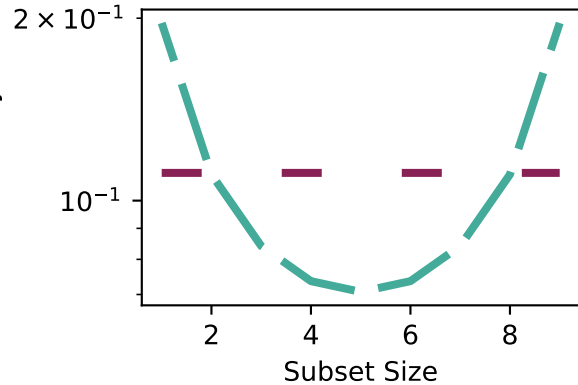

$n = 100$

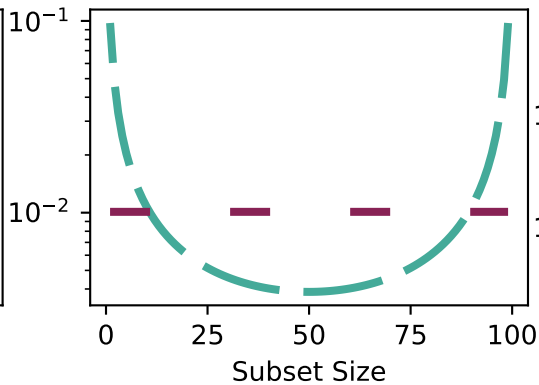

$n = 1000$

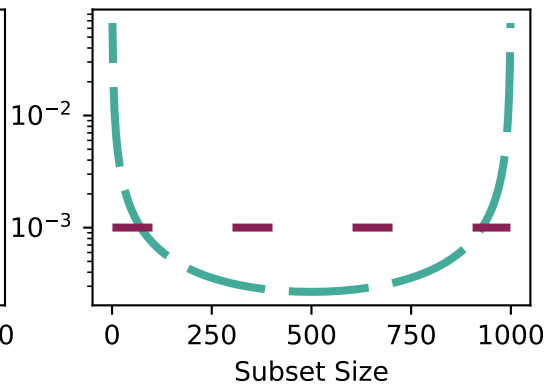

Kernel SHAP      Leverage SHAP

Supplement: supplementary_material [file sampling_prob.pdf › kernelprob/archive/images/sampling_prob.pdf]

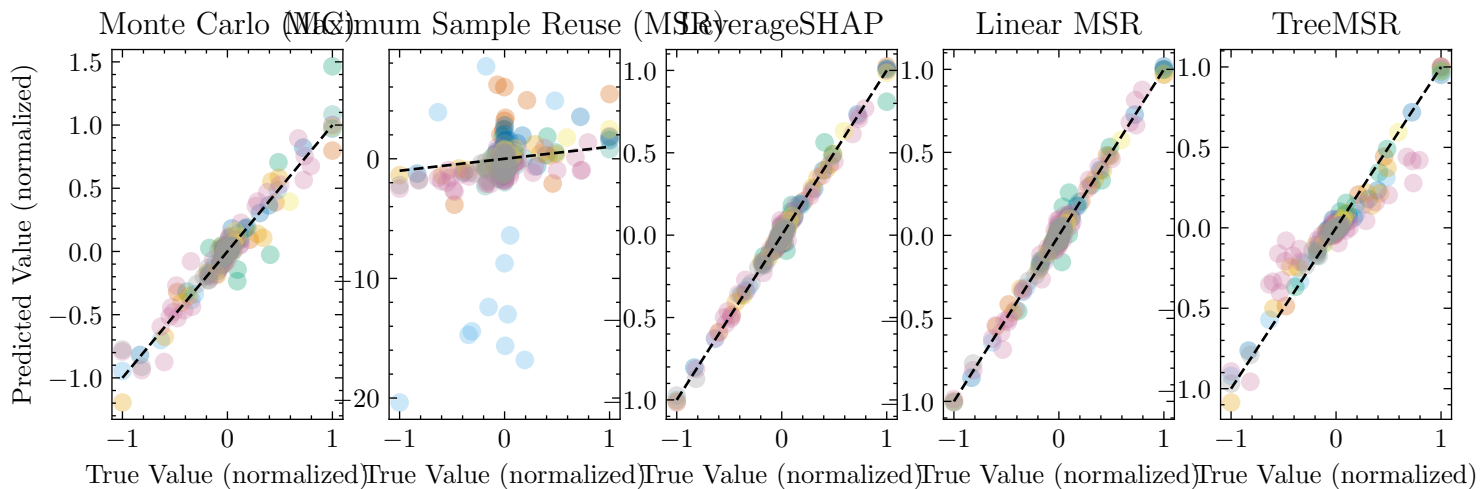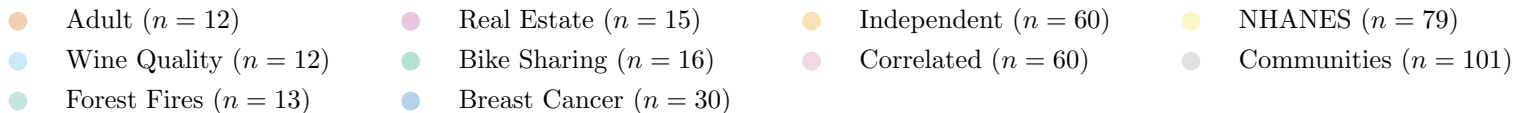

Supplement: supplementary_material [file case_study.pdf › kernelprob/images/case_study.pdf]

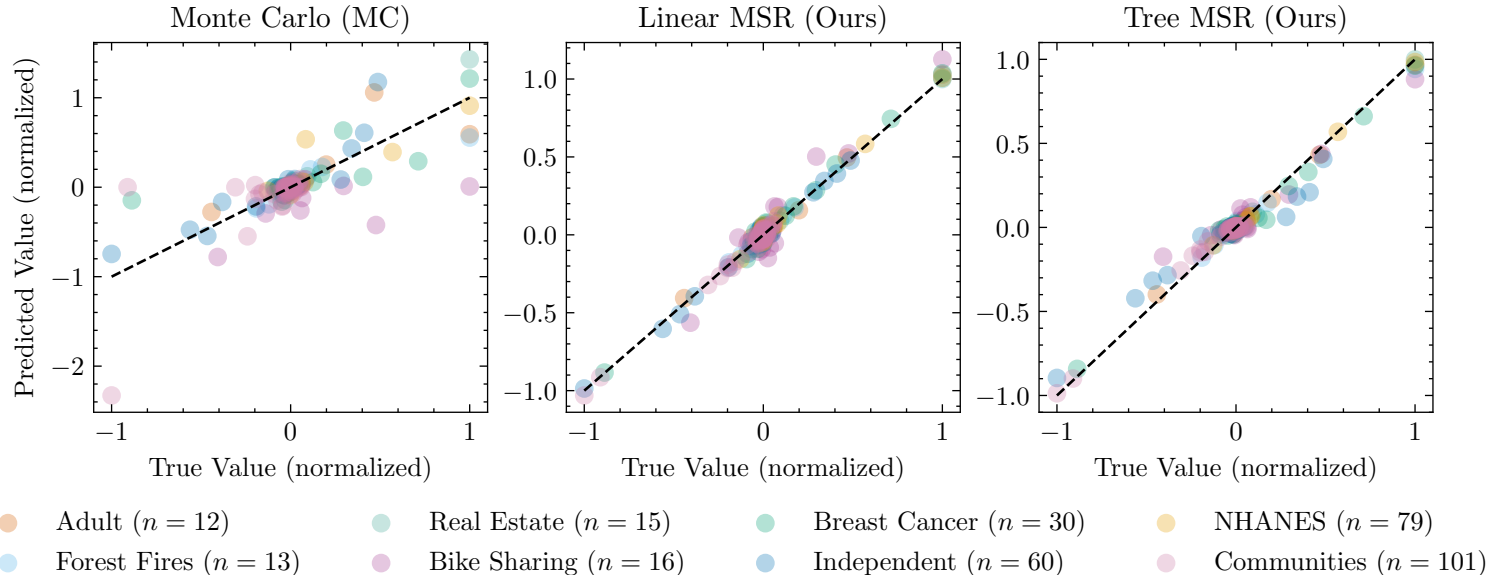

Supplement: supplementary_material [file case_study_beta_shapley_8_8.pdf › kernelprob/images/case_study_beta_shapley_8_8.pdf]

Monte Carlo (MC)

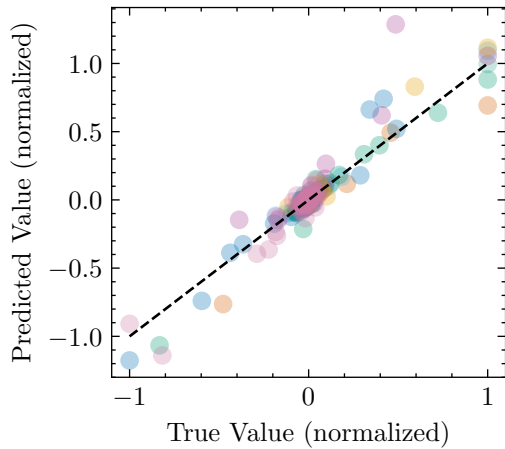

Maximum Sample Reuse (MSR)

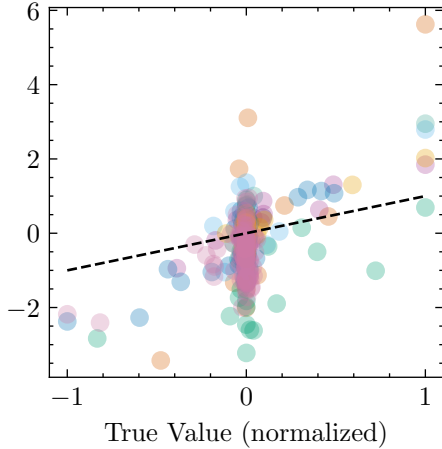

Linear MSR (Ours)

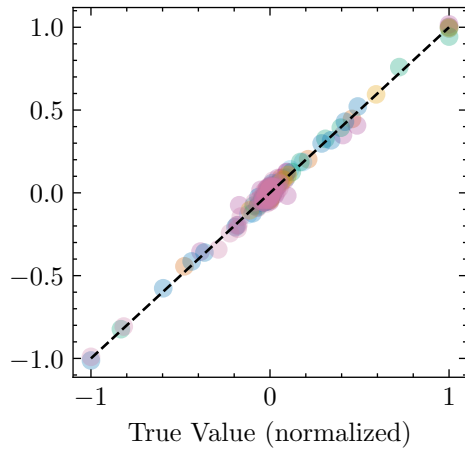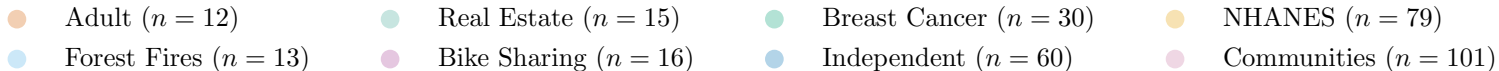

Supplement: supplementary_material [file case_study_shapley.pdf › kernelprob/images/case_study_shapley.pdf]

Monte Carlo (MC)

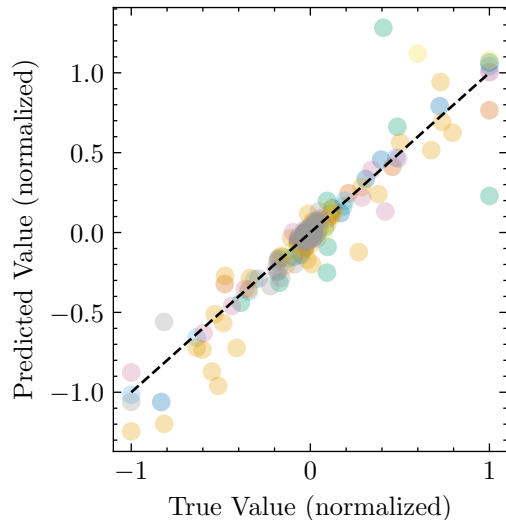

Maximum Sample Reuse (MSR)

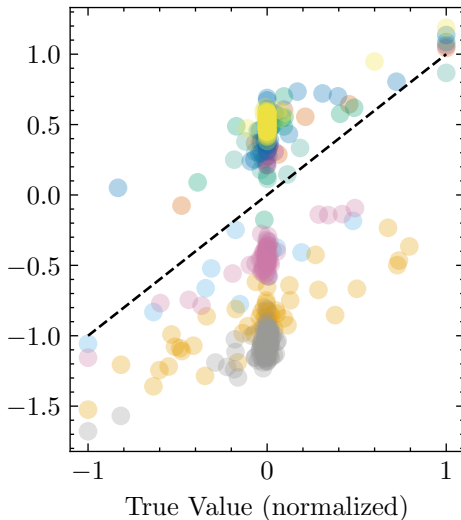

Linear MSR

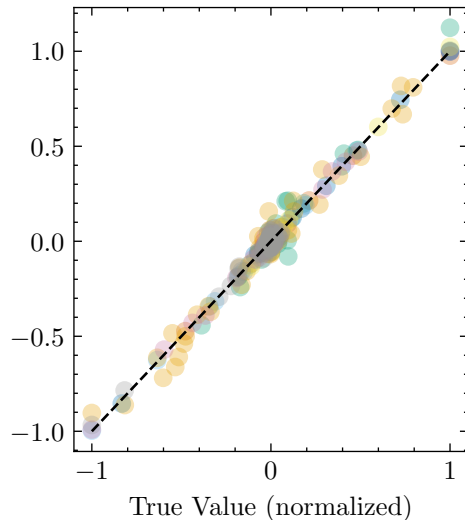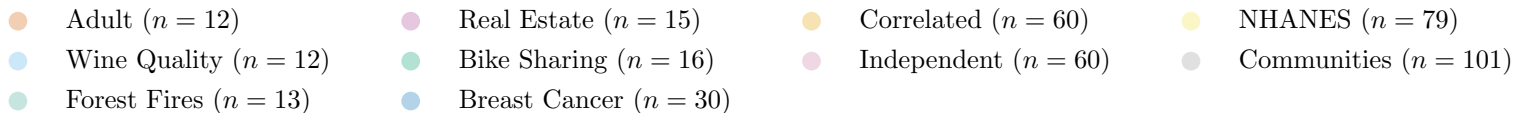

Supplement: supplementary_material [file case_study_wo_lev.pdf › kernelprob/images/case_study_wo_lev.pdf]

# Generalization Error (All Datasets)

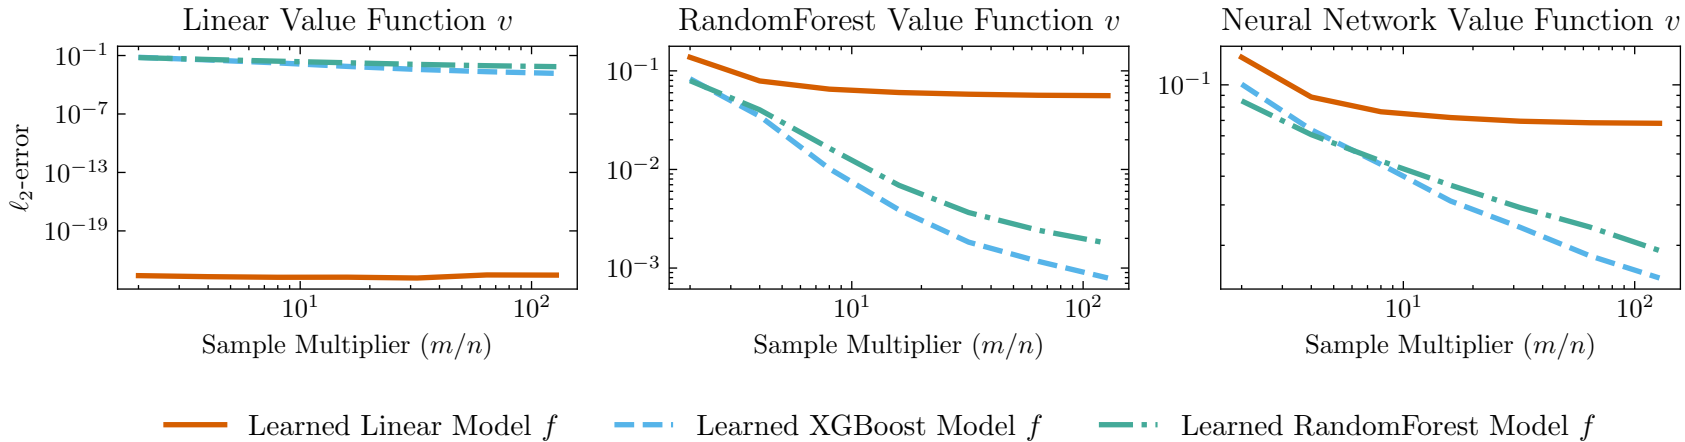

Supplement: supplementary_material [file fit_sample_complexity.pdf › kernelprob/images/fit_sample_complexity.pdf]

# Probabilistic Values: Error vs Sample Complexity (Regression Forest Ground Truth)

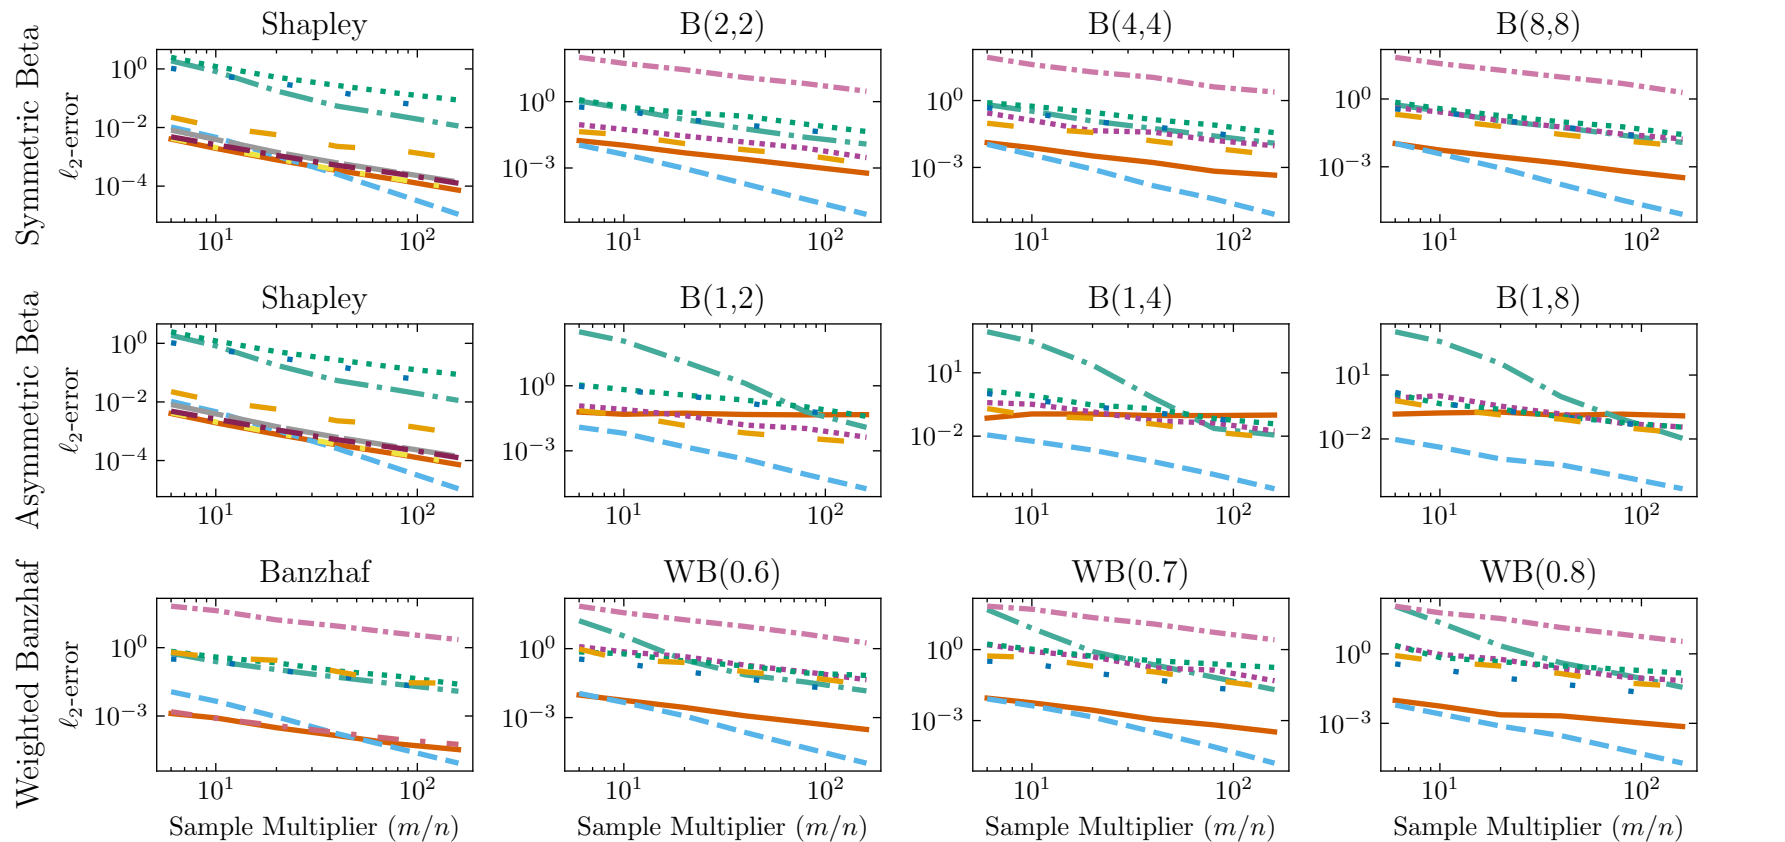

Supplement: supplementary_material [file prob_complexity_big_n.pdf › kernelprob/images/prob_complexity_big_n.pdf]

# Probabilistic Values: Error vs Noise Magnitude (Regression Forest Ground Truth)

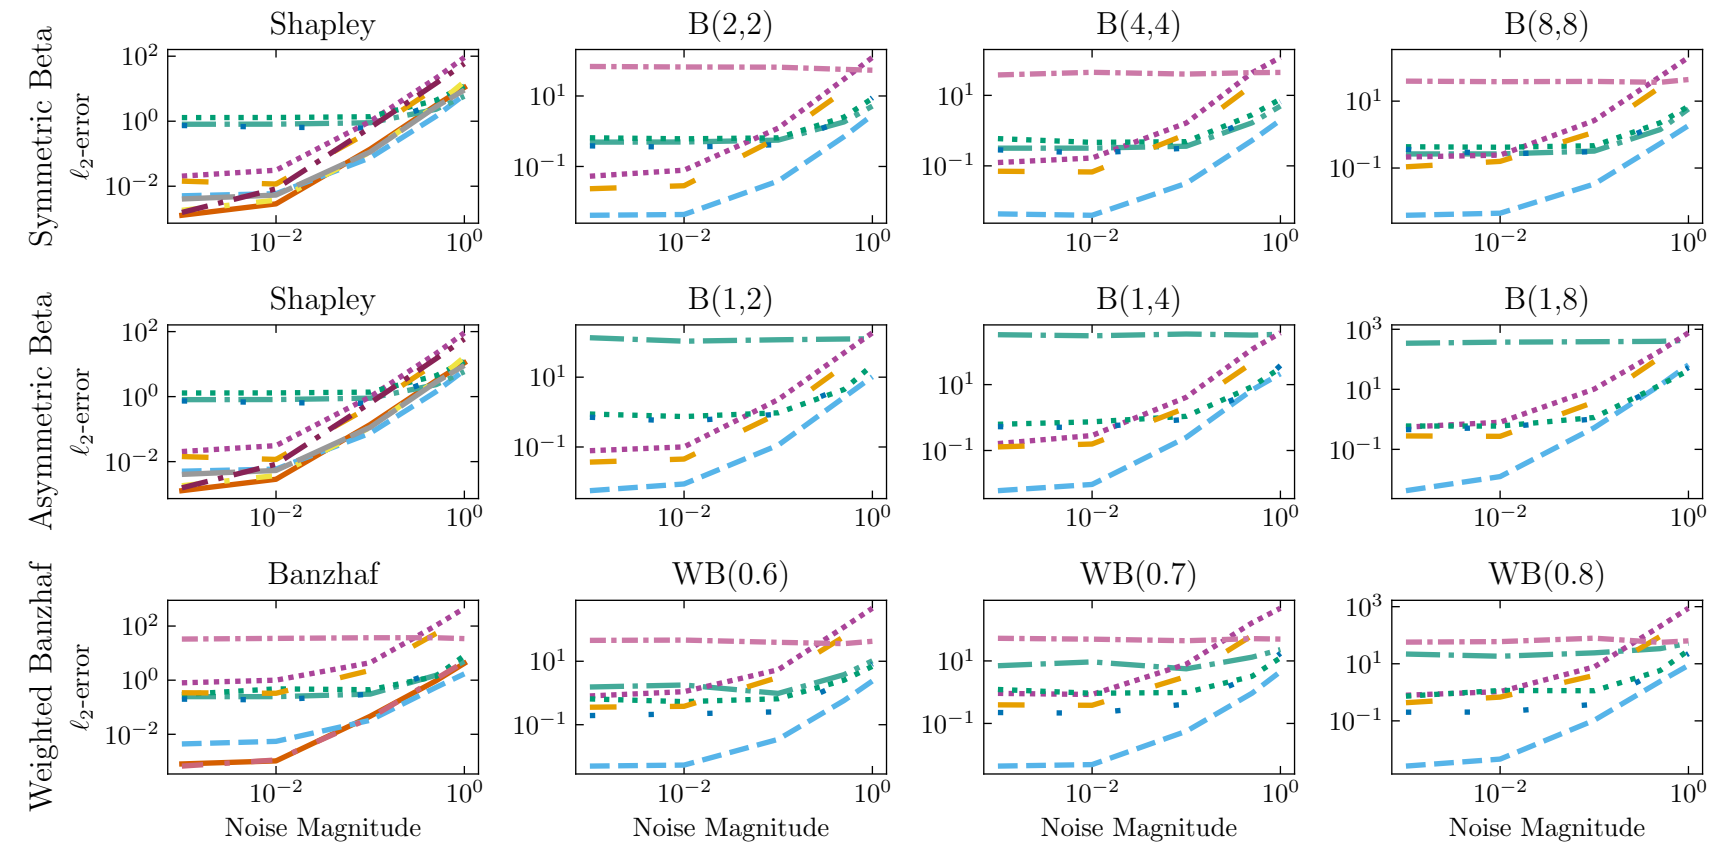

Supplement: supplementary_material [file prob_complexity_big_n_noise.pdf › kernelprob/images/prob_complexity_big_n_noise.pdf]

# Probabilistic Values: Error vs Sample Complexity (Neural Net Ground Truth)

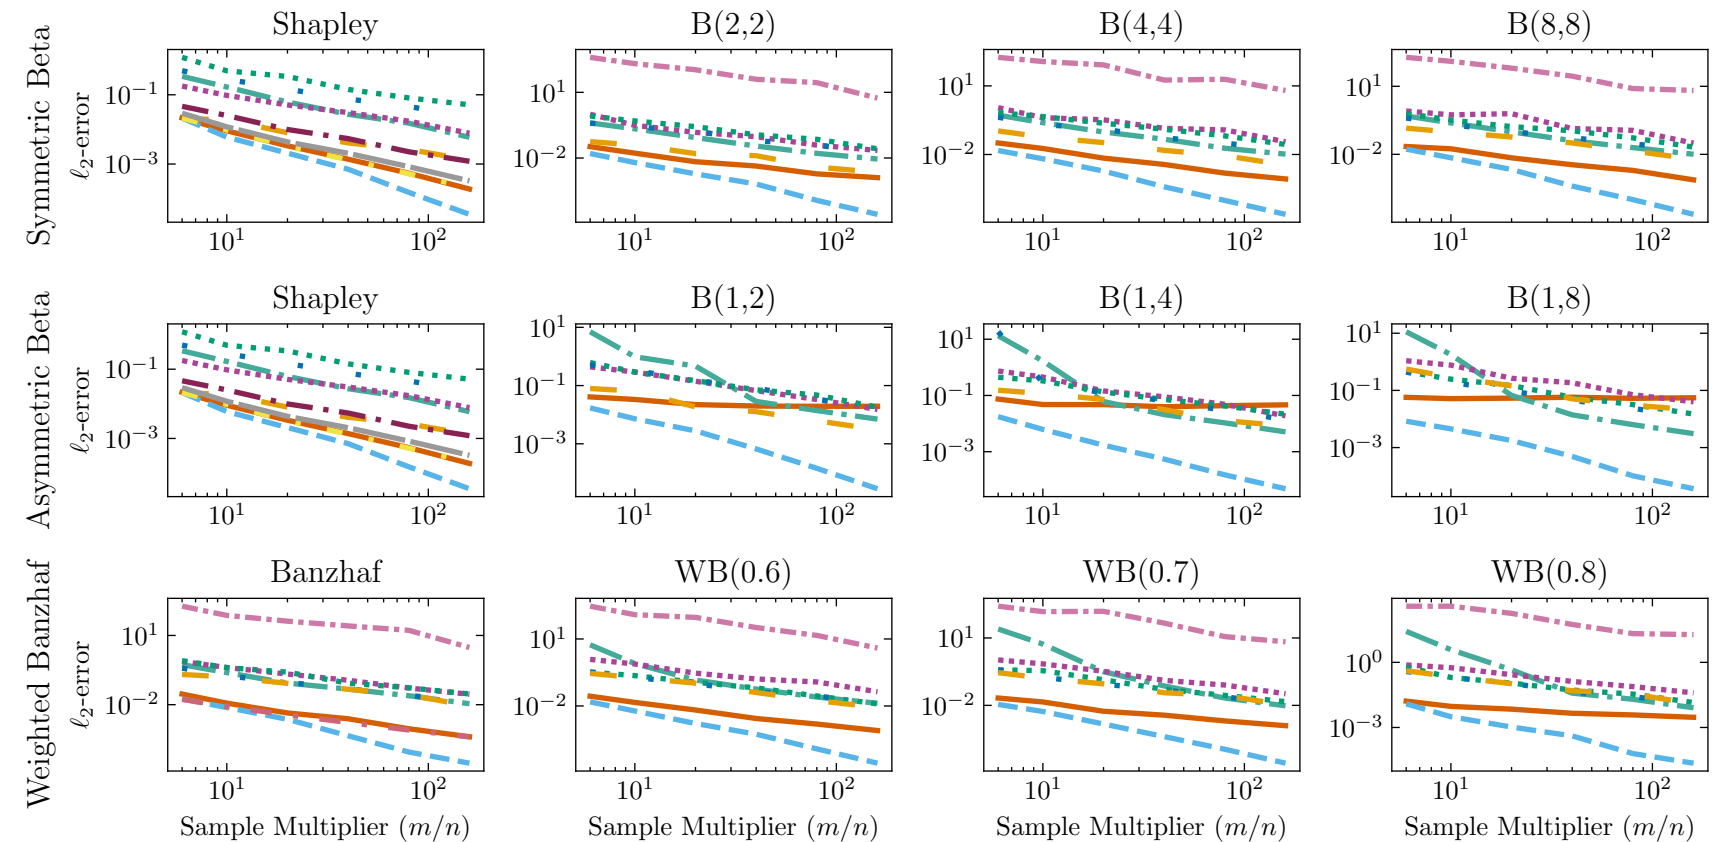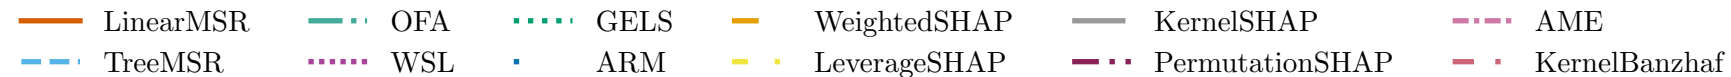

Supplement: supplementary_material [file prob_complexity_small_n.pdf › kernelprob/images/prob_complexity_small_n.pdf]

# Probabilistic Values: Error vs Noise Magnitude (Neural Net Ground Truth)

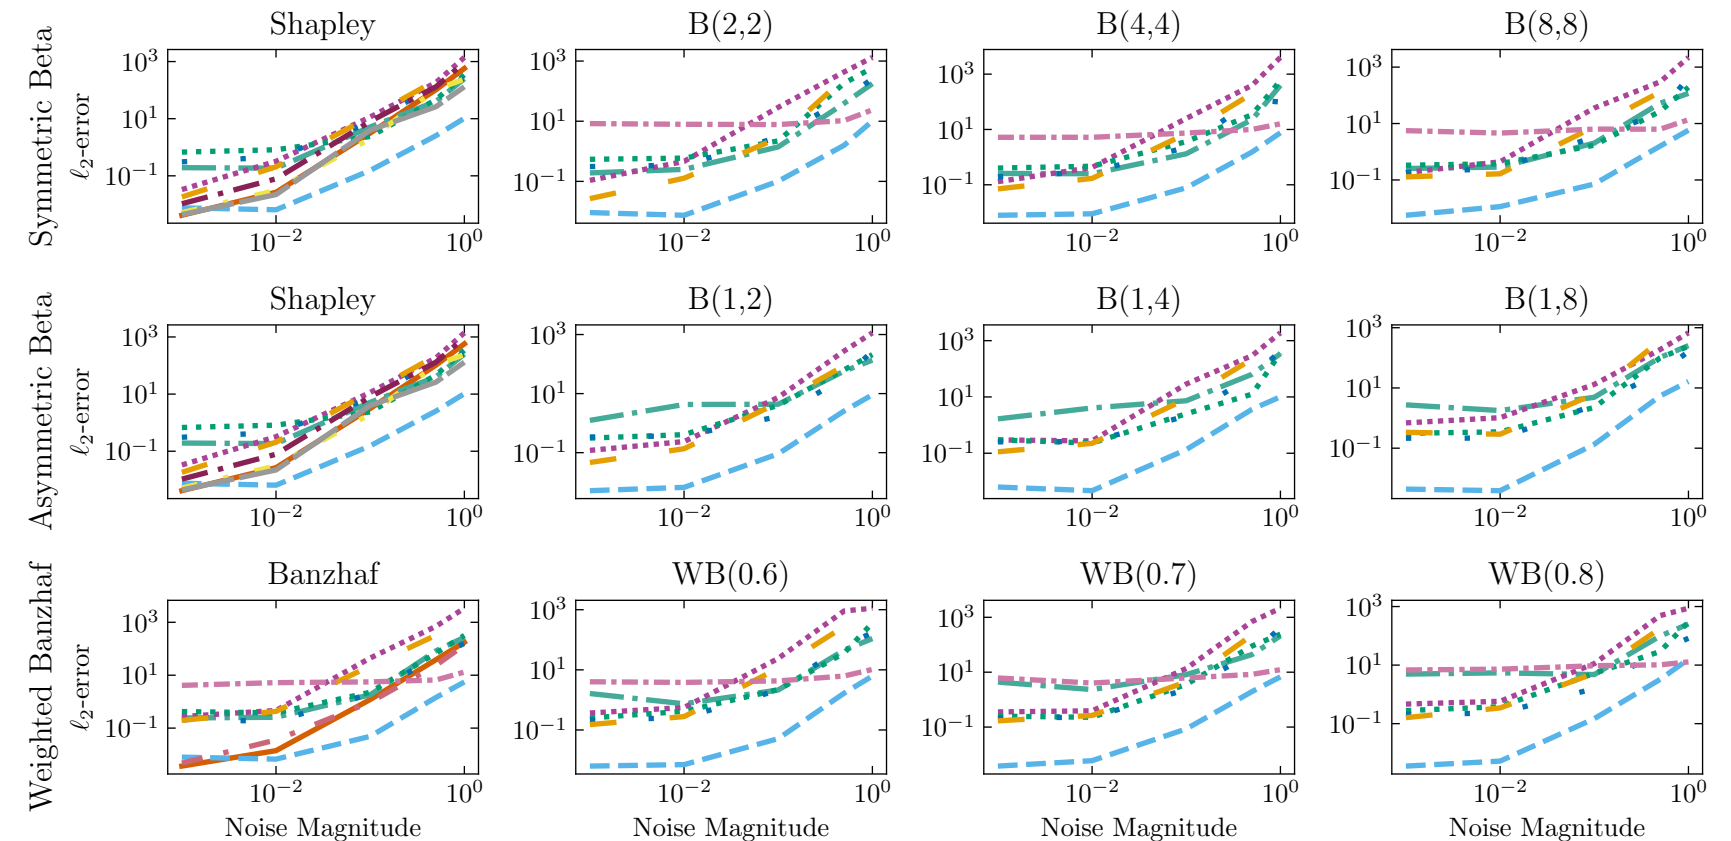

Supplement: supplementary_material [file prob_complexity_small_n_noise.pdf › kernelprob/images/prob_complexity_small_n_noise.pdf]

Symmetric Beta Shapley ( $n = 10$ )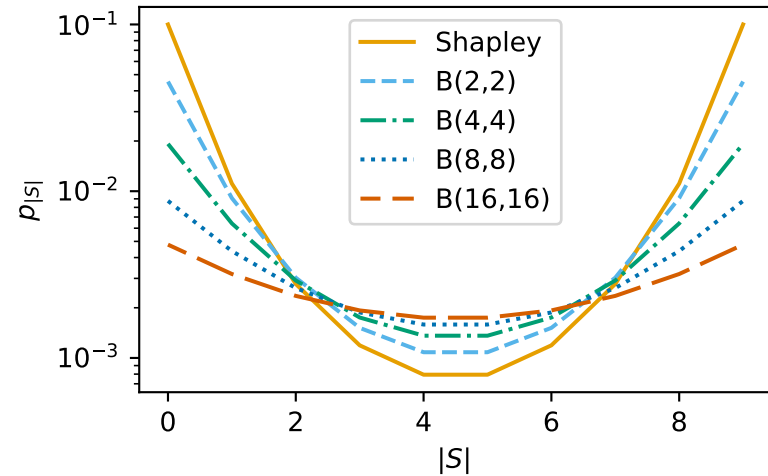Asymmetric Beta Shapley ( $n = 10$ )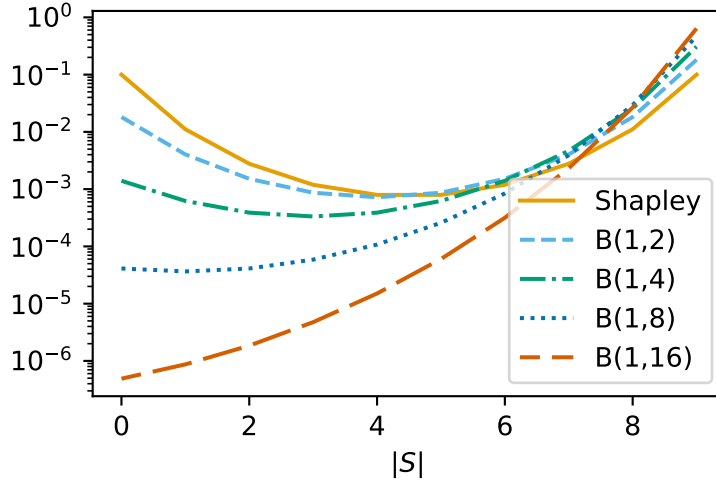Weighted Banzhaf ( $n = 10$ )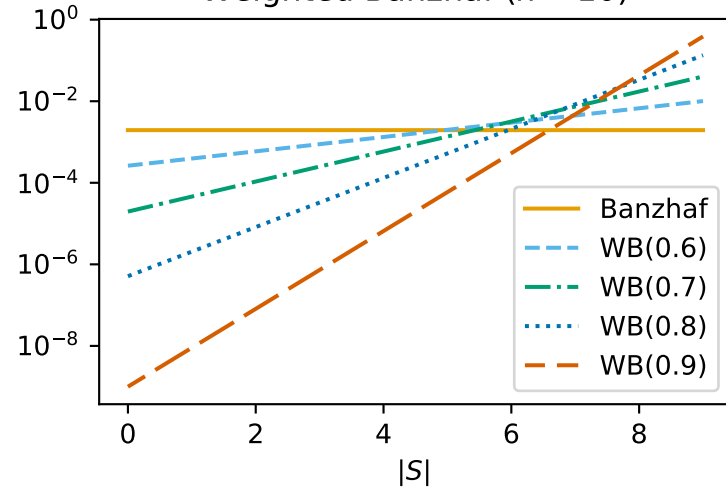

Supplement: supplementary_material [file probabilistic_values.pdf › kernelprob/images/probabilistic_values.pdf]

# Shapley Values: Error vs Noise Magnitude

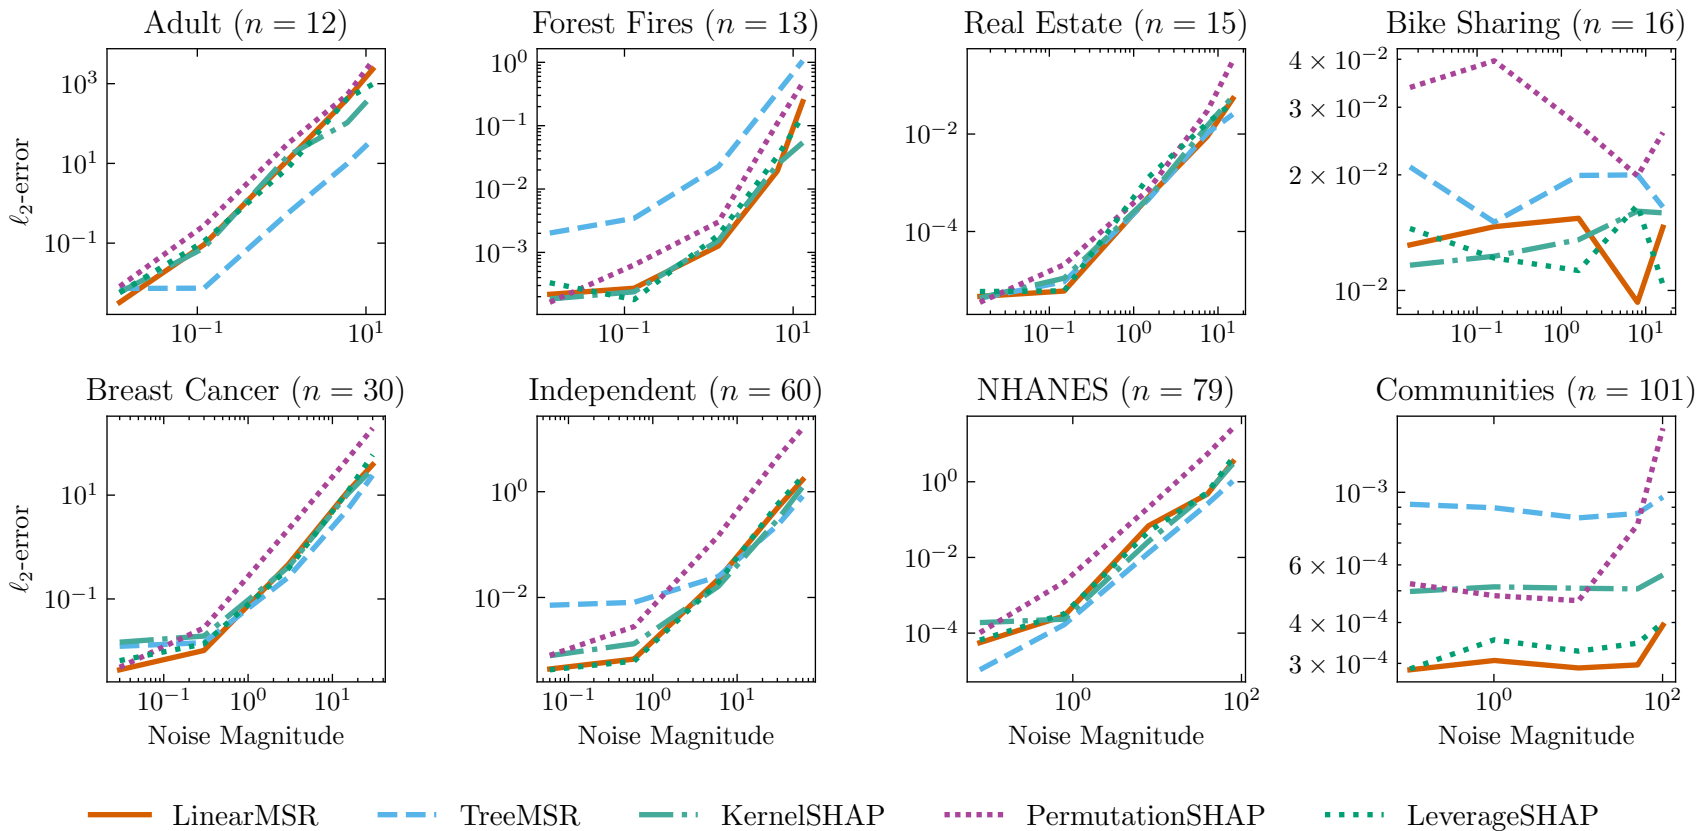

Supplement: supplementary_material [file shapley_noise.pdf › kernelprob/images/shapley_noise.pdf]

# Shapley Values: Error vs Sample Complexity

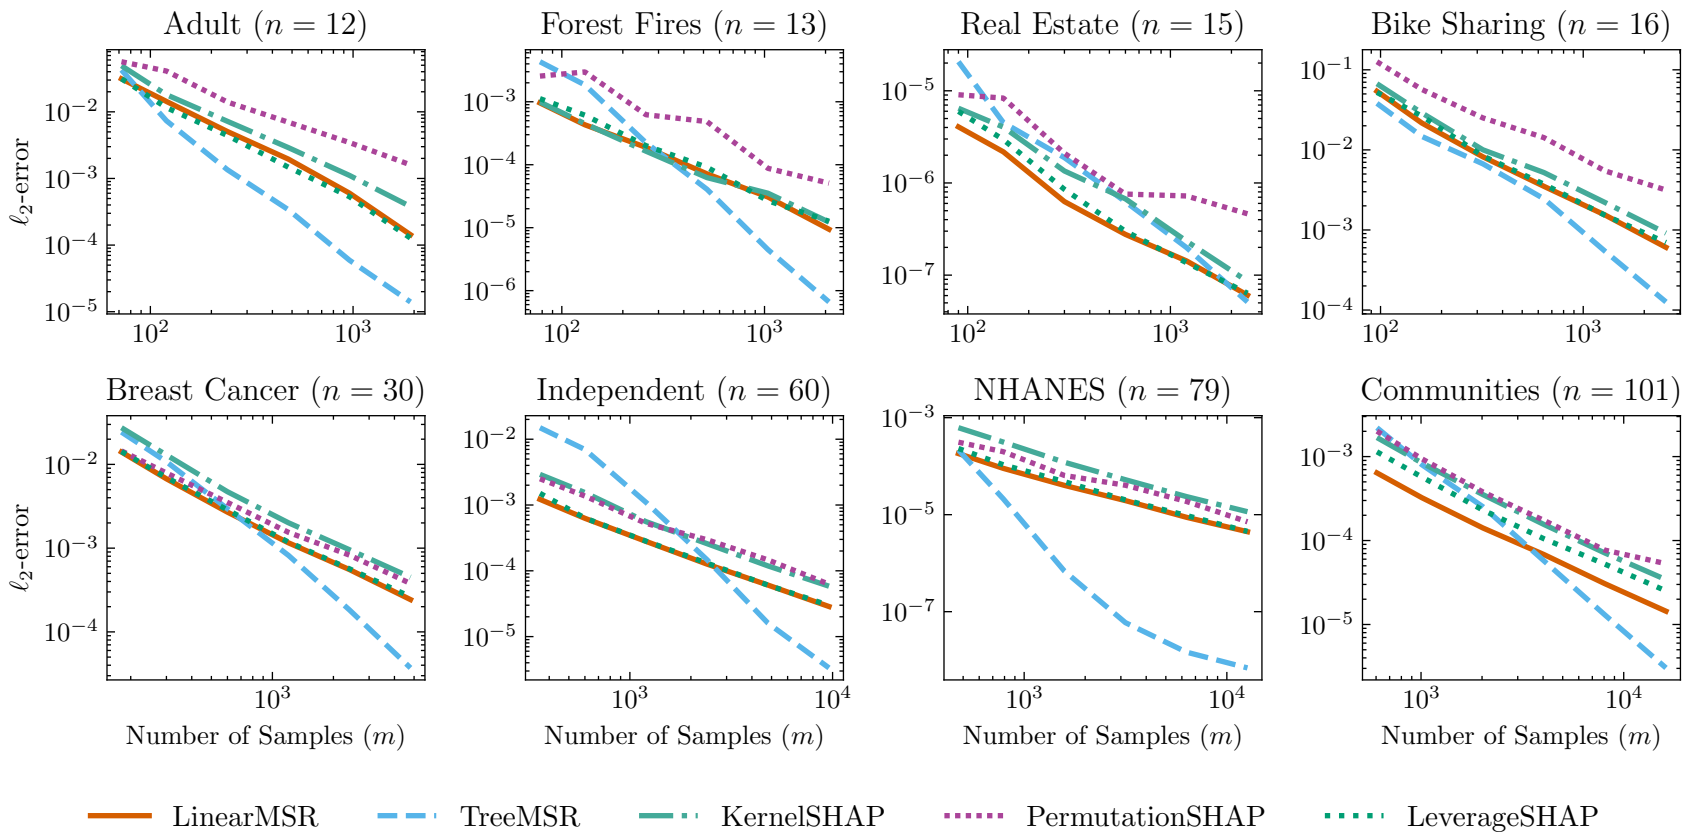

Supplement: supplementary_material [file shapley_sample_size.pdf › kernelprob/images/shapley_sample_size.pdf]
